# Supplementary material for: Significantly enhanced energy storage density in lead-free barium strontium titanate-based ceramics through a cooperative optimization strategy
Source: Royal Society of Chemistry journal article supplement (doi:10.1039/d3tc03806h), 2023-01-01
Supplement: d3tc03806h1.pdf [file d3tc03806h1.pdf]

## Supporting Information

### Significantly Enhanced Energy Storage Density in Lead-Free Barium Strontium Titanate- Based Ceramics through a Cooperative Optimization Strategy

*Jia-Jia Ren, Di-Ming Xu,\* Da Li, Wei-Chen Zhao, Meng-Kang Xu, Zhong-Qi Shi, Tao Zhou, Hui-Xing Lin, and Di Zhou,\**

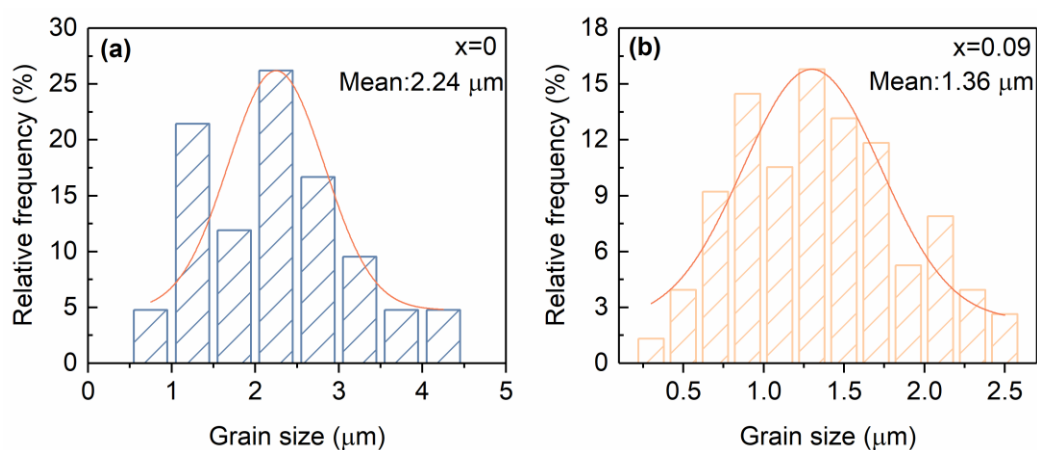

**Fig. S1** Statistical diagram of grain size in SEM image of (a)  $x = 0$  and (b)  $x = 0.09$  ceramic.

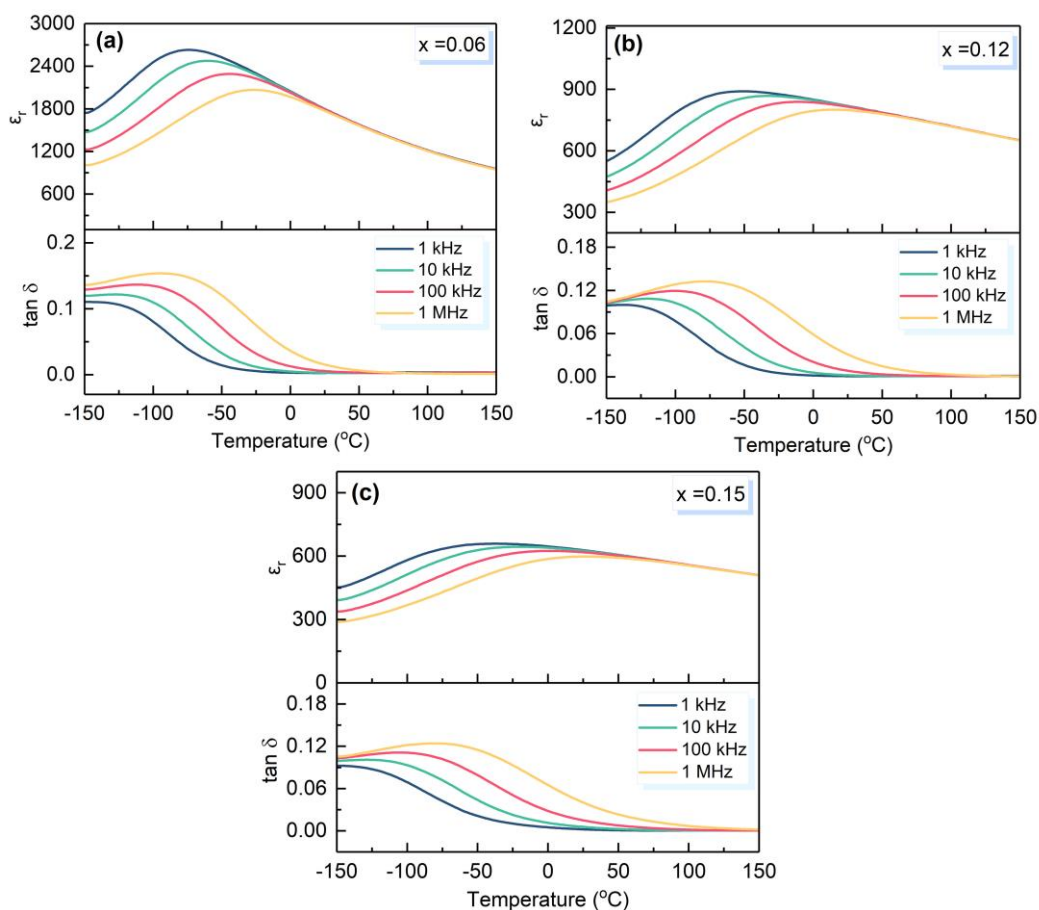

**Fig. S2** Temperature-dependent  $\epsilon_r$  and  $\tan\delta$  with different frequencies for (a)  $x = 0.06$ , (b)  $x = 0.12$  and (c)  $x = 0.15$  ceramics.

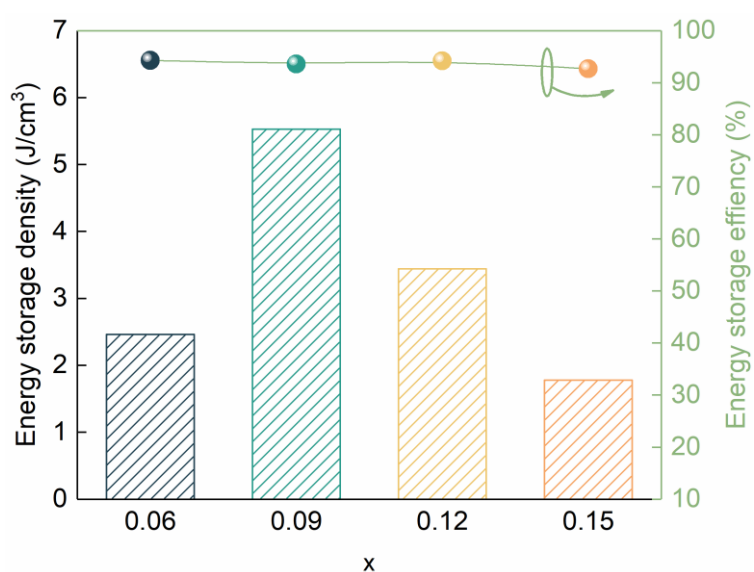

**Fig. S3**  $W_{rec}$ ,  $\eta$  of the  $(1-x)(Ba_{0.8}Sr_{0.2})TiO_3-xBi(Zn_{2/3}Ta_{1/3})O_3$  ( $0.06 \leq x \leq 0.15$ ) ceramics.

**Table S1** Comparison of  $E_b$ ,  $W_{rec}$ , and  $\eta$  between this work and other bulk ceramic capacitors.

| Compositions                                                                                   | $E_b$<br>(kV/cm) | $W_{rec}$<br>(J/cm <sup>3</sup> ) | $\eta$<br>(%) | Ref.  |
|------------------------------------------------------------------------------------------------|------------------|-----------------------------------|---------------|-------|
| $Ba_{0.4}Sr_{0.6}TiO_3$                                                                        | 167.2            | 1.081                             | 73.78         | [S1]  |
| $0.75(Ba_{0.4}Sr_{0.6})TiO_3-0.25Bi_{0.5}Na_{0.5}TiO_3$                                        | 360              | 3.89                              | 83.8          | [S2]  |
| $(Ba_{0.4}Sr_{0.6})TiO_3-9wt\%(Bi_2O_3-B_2O_3-SiO_2)$                                          | 279              | 1.98                              | 90.57         | [S3]  |
| $0.8Ba_{0.2}Sr_{0.8}TiO_3-0.2Bi(Mg_{0.5}Zr_{0.5})O_3+2\%SrO-$<br>$B_2O_3-ZnO$                  | 285              | 2.13                              | 94.1          | [S4]  |
| $0.775(Ba_{0.4}Sr_{0.6})TiO_3-0.225Bi(Zn_{2/3}Nb_{1/3})O_3$                                    | 170              | 0.62                              | 92.9          | [S5]  |
| $Ba_{0.65}Sr_{0.35}TiO_3$                                                                      | 75               | 0.2812                            | 78.67         | [S6]  |
| $0.88Ba_{0.8}Sr_{0.2}TiO_3-0.12BiTaO_3$                                                        | 130              | 0.526                             | 98            | [S7]  |
| $(Ba_{0.4}Sr_{0.6})TiO_3$ (MWS)                                                                | 180              | 1.15                              | 82            | [S8]  |
| $(Ba_{0.6}Sr_{0.4})_{1-1.5x}Bi_xTi_{1-x}(Mg_{1/3}Nb_{2/3})_xO_3$ ( $x = 0.9$ )                 | 390              | 3.74                              | 77            | [S9]  |
| $99wt\%Ba_{0.4}Sr_{0.6}TiO_3-1wt\%Al_2O_3$                                                     | 300              | 1.69                              | 83.6          | [S10] |
| $Ba_{0.3}Sr_{0.7}TiO_3+2\%$ BBSZ                                                               | 160              | 0.63                              | 91.6          | [S11] |
| $95wt\%Ba_{0.4}Sr_{0.6}TiO_3-5wt\%MgO$                                                         | 300              | 1.5                               | 88.5          | [S12] |
| $Ba_{0.3}Sr_{0.7}TiO_3-3wt\%$ SiO <sub>2</sub>                                                 | 380              | 1.52                              | 82.2          | [S13] |
| $0.88Ba_{0.4}Sr_{0.6}TiO_3-0.12Bi_{0.5}La_{0.5}(Zn_{0.5}Sn_{0.5})O_3$                          | 480              | 2.76                              | 92            | [S14] |
| $99.5wt\%Ba_{0.4}Sr_{0.6}TiO_3-0.5 wt\%$ SiO <sub>2</sub>                                      | 134              | 0.86                              | 79            | [S15] |
| $0.7Ba_{0.55}Sr_{0.45}TiO_3-0.3Bi_{0.5}Na_{0.5}TiO_3$                                          | 206              | 1.73                              | 84.4          | [S16] |
| $0.72(0.5(Ba_{0.4}Sr_{0.6}TiO_3)-0.5(Bi_{0.5}Na_{0.5}TiO_3))-$<br>$0.28Ca_{0.85}Bi_{0.1}TiO_3$ | 166              | 2.2                               | 73.2          | [S17] |

|                                                                                                                                               |       |       |       |           |
|-----------------------------------------------------------------------------------------------------------------------------------------------|-------|-------|-------|-----------|
| $0.93\text{Ba}_{0.55}\text{Sr}_{0.45}\text{TiO}_3 - 0.07\text{BiMg}_{2/3}\text{Nb}_{1/3}\text{O}_3$                                           | 450   | 4.55  | 81.8  | [S18]     |
| $0.1\text{Bi}(\text{Mg}_{2/3}\text{Nb}_{1/3})\text{O}_3 - 0.9(\text{Ba}_{0.8}\text{Sr}_{0.2})\text{TiO}_3$                                    | 250   | 2.03  | 96.8  | [S19]     |
| $0.9(\text{Ba}_{0.9}\text{Sr}_{0.1})\text{TiO}_3 - 0.1\text{Bi}(\text{Mg}_{0.5}\text{Zr}_{0.5})\text{O}_3$                                    | 180   | 2.1   | 88    | [S20]     |
| $\text{Ba}_{0.4}\text{Sr}_{0.6}(\text{Ti}_{0.996}\text{Mn}_{0.004})\text{O}_3 - 2 \text{ wt}\% \text{ MgO}$                                   | 300   | 2.014 | 88.6  | [S21]     |
| $\text{Ba}_{0.67-x}\text{Y}_x\text{Sr}_{0.33}\text{Ti}_{0.995}\text{Mn}_{0.005}\text{O}_3$ ( $x=0.012$ )                                      | 150   | 0.95  | 91    | [S22]     |
| $0.8\text{Ba}_{0.4}\text{Sr}_{0.6}\text{TiO}_3 - 0.2\text{Sr}_{0.7}\text{Bi}_{0.2}\text{TiO}_3$                                               | 300   | 3.3   | 85    | [S23]     |
| $0.6(\text{Ba}_{0.75}\text{Sr}_{0.25})\text{TiO}_3 - 0.4\text{Bi}(\text{Mg}_{0.5}\text{Hf}_{0.5})\text{O}_3$                                  | 390   | 4.3   | 92    | [S24]     |
| $\text{Ba}_{0.4}\text{Sr}_{0.6}\text{TiO}_3 + \text{ZnO} - \text{Li}_2\text{O}$                                                               | 198.8 | 0.564 | 87.7  | [S25]     |
| $\text{Ba}_{0.4}\text{Sr}_{0.6}\text{TiO}_3 + \text{Al}_2\text{O}_3 - \text{SiO}_2$                                                           | 169   | 0.39  | 92.1  | [S25]     |
| $0.9\text{Ba}_{0.65}\text{Sr}_{0.35}\text{TiO}_3 - 0.1\text{Bi}(\text{Mg}_{2/3}\text{Nb}_{1/3})\text{O}_3$                                    | 400   | 3.34  | 85.71 | [S26]     |
| $0.8\text{Ba}_{0.4}\text{Sr}_{0.6}\text{TiO}_3 - 0.2\text{Bi}(\text{Mg}_{0.5}\text{Ti}_{0.5})\text{O}_3$                                      | 300   | 2.118 | 93    | [S27]     |
| $\text{Ba}_{0.3}\text{Sr}_{0.475}\text{La}_{0.12}\text{Ce}_{0.03}\text{Ti}_{1-x}\text{Mn}_x\text{O}_3$ ( $x = 0.003$ )                        | 247   | 0.953 | 93    | [S28]     |
| $\text{Ba}_{0.6}\text{Sr}_{0.34}\text{Ce}_{0.04}\text{TiO}_3$                                                                                 | 235   | 1.75  | 85    | [S29]     |
| $(\text{Ba}_{0.3}\text{Sr}_{0.7})_{0.5}(\text{Bi}_{0.5}\text{Na}_{0.5})_{0.5}\text{TiO}_3$                                                    | 100   | 1.04  | 77    | [S30]     |
| $\text{Ba}_{0.4}\text{Sr}_{0.6}\text{TiO}_3 - 8 \text{ mol}\% \text{ SiO}_2$                                                                  | 400   | 1.6   | 90.9  | [S31]     |
| $\text{Ba}_{0.4}\text{Sr}_{0.6}\text{TiO}_3$ (SPS)                                                                                            | 240   | 1.23  | 94.52 | [S32]     |
| $\text{Ba}_{0.4}\text{Sr}_{0.6}\text{TiO}_3 + 2 \text{ wt}\% \text{ SrO} - \text{B}_2\text{O}_3 - \text{SiO}_2$                               | 90    | 0.44  | 67.4  | [S33]     |
| $\text{Ba}_{0.4}\text{Sr}_{0.6}\text{Zr}_{0.15}\text{Ti}_{0.85}\text{O}_3 + 5 \text{ wt}\% \text{ SrO} - \text{B}_2\text{O}_3 - \text{SiO}_2$ | 127   | 0.45  | 88.2  | [S34]     |
| $\text{Ba}_{0.5}\text{Sr}_{0.5}\text{TiO}_3 - 1 \text{ wt}\% \text{ SiO}_2$                                                                   | 290   | 2.0   | 80    | [S35]     |
| $0.91(\text{Ba}_{0.8}\text{Sr}_{0.2})\text{TiO}_3 - 0.09\text{Bi}(\text{Zn}_{2/3}\text{Ta}_{1/3})\text{O}_3$                                  | 460   | 5.53  | 93.6  | This work |

## References

- [S1]. Q. Jin, Y. P. Pu, C. Wang, Z. Y. Gao and H. Y. Zheng, *Ceram. Int.*, 2017, **43**, S232-S238.
- [S2]. K. Zhang, P. Zheng, H. F. Zhang, Z. A. Niu, C. Luo, W. F. Bai, J. J. Zhang, L. Zheng and Y. Zhang, *Ceram. Int.*, 2022, **48**, 19864-19873.
- [S3]. H. B. Yang, F. Yan, Y. Lin and T. Wang, *J. Eur. Ceram. Soc.*, 2018, **38**, 1367-1373.
- [S4]. H. Xu, J. S. Liu, P. P. Luo and M. S. Zeng, *J. Mater. Sci.: Mater. Electron.*, 2023, **34**, 1048.
- [S5]. Z. F. He, H. Q. Li, Z. Qing, M. S. Zeng, J. li, L. L. Zhou, X. Y. Zhong and J. S. Liu, *J. Mater. Sci.: Mater. Electron.*, 2021, **32**, 752-763.
- [S6]. P. Z. Ge, X. G. Tang, Q. X. Liu, Y. P. Jiang, W. H. Li and J. Luo, *J. Mater. Sci.: Mater. Electron.*, 2018, **29**, 1075-1081.
- [S7]. H. Zhao, X. Y. Duan, T. L. Yu, D. Xu and W. J. Zhao, *Solid State Commun.*, 2023, **360**, 115050.
- [S8]. Z. Song, S. J. Zhang, H. X. Liu, H. Hao, M. H. Cao, Q. Li, Q. Wang, Z. H. Yao, Z. J. Wang and M. T. Lanagan, *J. Am. Ceram. Soc.*, 2015, **98**, 3212-3222.
- [S9]. Y. M. Li and J. J. Bian, *Int. J. Appl. Ceram. Technol.*, 2023, **20**, 2360-2370.
- [S10]. F. Lv, X. C. Jiang, L. M. Zhou, Z. J. Hong, Y. J. Wu and Y. H. Huang, *J. Alloys Compd.*, 2022, **923**, 166344.
- [S11]. Z. Y. Shen, Y. Wang, Y. X. Tang, Y. Y. Yu, W. Q. Luo, X. C. Wang, Y. M. Li, Z. M. Wang and F. S. Song, *J. Materiomics*, 2019, **5**, 641-648.
- [S12]. Y. H. Huang, Y. J. Wu, W. J. Qiu, J. Li and X. M. Chen, *J. Eur. Ceram. Soc.*, 2015, **35**, 1469-1476.
- [S13]. M. Liu, M. H. Cao, F. Z. Zeng, J. L. Qi, H. X. Liu, H. Hao and Z. H. Yao, *Ceram. Int.*, 2018,

44, 20239-20244.

- [S14]. X. C. Liu, Y. Yuan, L. Cao, E. Z. Li and S. R. Zhang, *Ceram. Int.*, 2022, **48**, 19382-19391.
- [S15]. C. L. Diao, H. X. Liu, H. Hao, M. H. Cao and Z. H. Yao, *Ceram. Int.*, 2016, **42**, 12639-12643.
- [S16]. F. Yang, Y. Chen, X. Li, W. Huang, G. S. Wang and X. L. Dong, *Ceram. Int.*, 2021, **47**, 25785-25793.
- [S17]. Y. C. Hu, S. T. Dang, J. Q. Cao, W. L. Zhang, Y. J. Zai, P. S. Xu and X. W. Wang, *Solid State Commun.*, 2023, **362**, 115100.
- [S18]. W. Huang, Y. Chen, X. Li, G. S. Wang, N. T. Liu, S. Li, M. X. Zhou and X. L. Dong, *Appl. Phys. Lett.*, 2018, **113**, 203902.
- [S19]. L. X. Pang, S. Ren, X. L. Wang, D. Zhou, W. G. Liu, C. Singh, A. S. B. Sombra and M. A. Darwish, *Adv. Eng. Mater.*, 2023, **n/a**, 2300321.
- [S20]. Z. C. Xia, Y. Q. Pan, Y. Chen and Z. P. Xu, *Cryst. Res. Technol.*, 2023, **58**, 2200147.
- [S21]. W. B. Li, D. Zhou and L. X. Pang, *J. Mater. Sci.: Mater. Electron.*, 2017, **28**, 8749-8754.
- [S22]. H. Qiang, S. W. Fu and Z. P. Xu, *Phys. Status Solidi A*, 2020, **217**, 2000559.
- [S23]. Q. Wang, T. T. Wang, L. Zhang, Z. Y. Liu, K. Guo, J. S. Lu and B. Xie, *Ceram. Int.*, 2022, **48**, 2068-2074.
- [S24]. X. Kong, L. T. Yang, Z. X. Cheng, G. M. Liang and S. J. Zhang, *ACS Appl. Energy Mater.*, 2020, **3**, 12254-12262.
- [S25]. B. B. Liu, X. H. Wang, R. X. Zhang and L. T. Li, *J. Alloys Compd.*, 2017, **691**, 619-623.
- [S26]. Z. H. Dai, J. L. Xie, W. G. Liu, X. Wang, L. Zhang, Z. J. Zhou, J. L. Li and X. B. Ren, *ACS Appl. Mater. Interfaces*, 2020, **12**, 30289-30296.

- [S27]. M. S. Zeng, J. S. Liu, H. Q. Li, S. R. Zhang and W. L. Zhang, *Ceram. Int.*, 2022, **48**, 23518-23526.
- [S28]. X. Y. Ye, Y. M. Li and J. J. Bian, *J. Eur. Ceram. Soc.*, 2017, **37**, 107-114.
- [S29]. Y. M. Li and J. J. Bian, *J. Eur. Ceram. Soc.*, 2020, **40**, 5441-5449.
- [S30]. D. X. Li, Z. Y. Shen, Z. P. Li, W. Q. Luo, X. C. Wang, Z. M. Wang, F. S. Song and Y. M. Li, *J. Adv. Ceram.*, 2020, **9**, 183-192.
- [S31]. Y. H. Huang, Y. J. Wu, B. Liu, T. N. Yang, J. J. Wang, J. Li, L. Q. Chen and X. M. Chen, *J. Mater. Chem. A*, 2018, **6**, 4477-4484.
- [S32]. Y. H. Huang, Y. J. Wu, J. Li, B. Liu and X. M. Chen, *J. Alloys Compd.*, 2017, **701**, 439-446.
- [S33]. K. Chen, Y. P. Pu, N. Xu and X. Luo, *J. Mater. Sci.: Mater. Electron.*, 2012, **23**, 1599-1603.
- [S34]. T. Wu, Y. P. Pu and K. Chen, *Ceram. Int.*, 2013, **39**, 6787-6793.
- [S35]. X. Lu, Y. Tong, H. Talebinezhad, L. Zhang and Z. Y. Cheng, *J. Alloys Compd.*, 2018, **745**, 127-134.
